# Supplementary material for: The S1 Subunit of the SARS-CoV-2 Spike Protein Activates Human Monocytes to Produce Cytokines Linked to COVID-19: Relevance to Galectin-3
Source: PubMed Central journal article supplement (PMC8982143; doi:10.3389/fimmu.2022.831763), 2022-03-22
Supplement: Image_2.pdf [file Image_2.pdf]

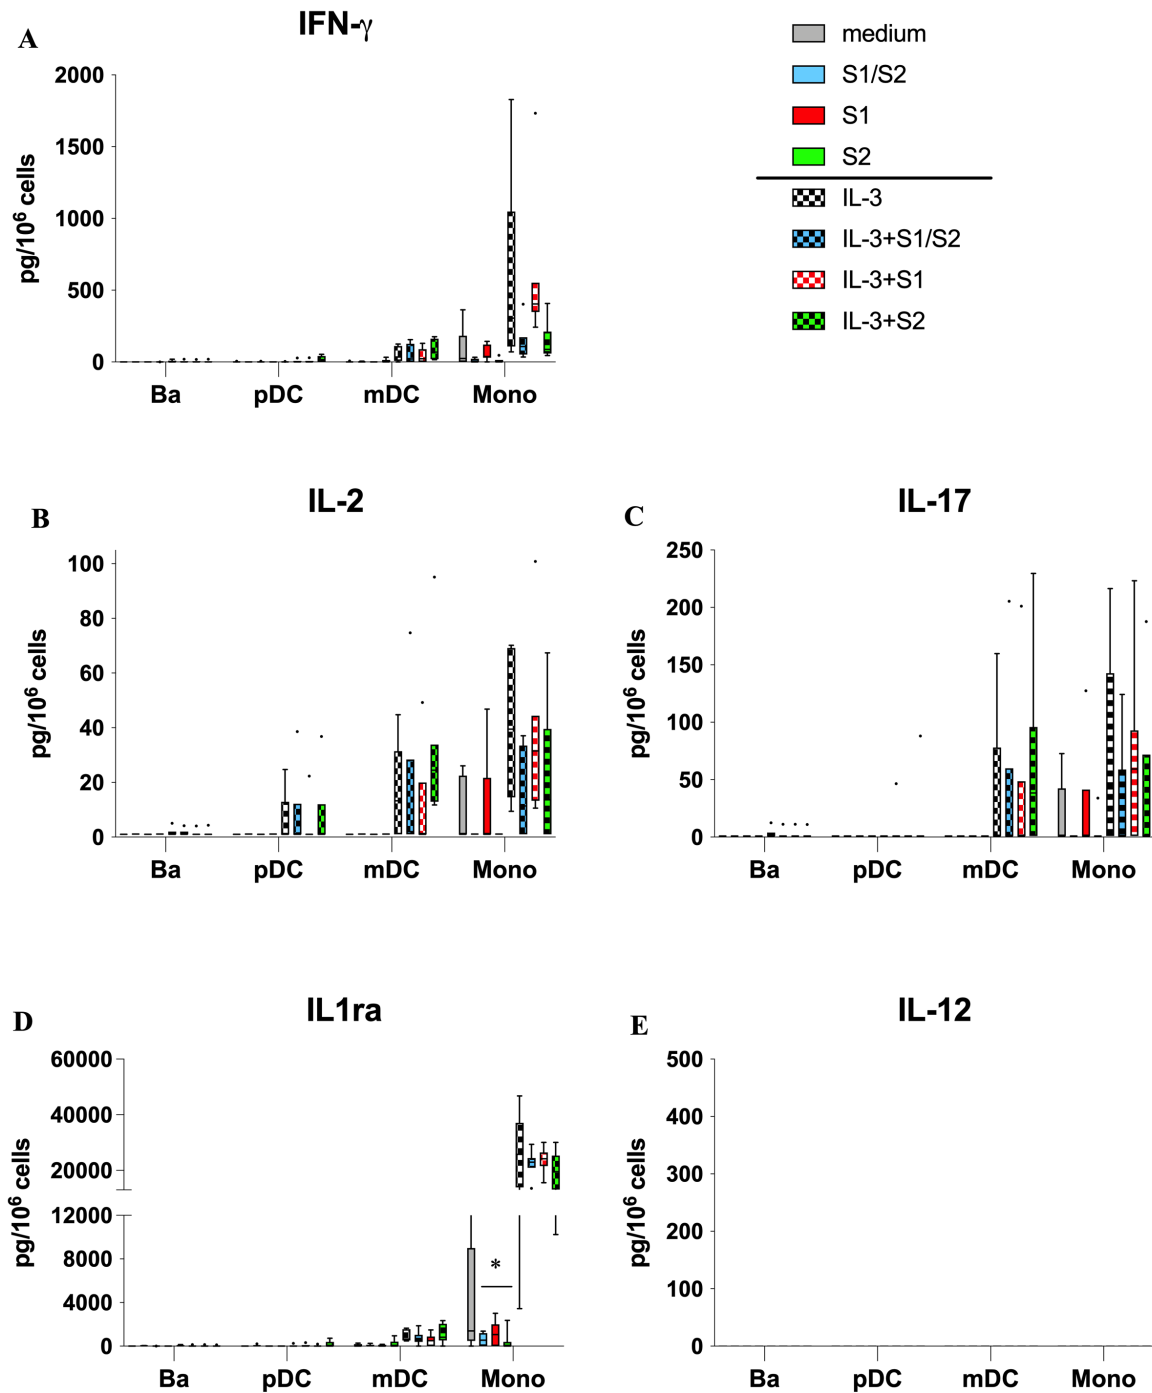

**Figure S2. Cytokine (Th1-like) responses to components of the SARS-CoV-2 spike protein.** Subunit components of the SARS-CoV-2 spike protein were passively absorbed onto polystyrene culture wells, as described in the Materials & Methods section. After overnight incubation at 4°C followed with 3x washes, basophils (Ba), pDC, mDC, and monocytes (Mono) were then cultured as indicated in medium alone or with IL-3 added to 10 ng/ml. After 20h incubation, cell-free supernatants were harvested for analysis of the indicated cytokines using multiplex analysis. Box-Whisker plots (Tukey's method) represent results from different donor cell preparations (n=7). Responses to spike protein components were tested for significance by comparing to medium/IL-3 controls. \*, P<0.05. Note: IL-12 levels fell below detection.
