# Supplementary material for: The S1 Subunit of the SARS-CoV-2 Spike Protein Activates Human Monocytes to Produce Cytokines Linked to COVID-19: Relevance to Galectin-3
Source: PubMed Central journal article supplement (PMC8982143; doi:10.3389/fimmu.2022.831763), 2022-03-22
Supplement: Table_1.pdf [file Table_1.pdf]

## Supplemental Data

Table S1. Summary of P values for monocyte cytokines induced by S1 subunit

| Cytokine            | vs. medium |          | vs. S2  |         | vs. S1/S2 |          |
|---------------------|------------|----------|---------|---------|-----------|----------|
|                     | -          | (+ IL-3) | -       | (+IL-3) | -         | (+ IL-3) |
| IL-6                | 0.0005     | <0.0001  | 0.0276  | <0.0001 | <0.0001   | <0.0001  |
| IL-1 $\beta$        | 0.0066     | NS       | <0.0001 | NS      | <0.0001   | NS       |
| TNF- $\alpha$       | 0.0005     | NS       | <0.0001 | NS      | 0.0007    | 0.0035   |
| CXCL10/IP-10        | 0.0415     | NS       | 0.0208  | NS      | 0.0284    | 0.0466*  |
| CCL2/MCP-1          | NS         | NS       | 0.0039  | 0.0036  | 0.0041    | 0.0045   |
| CCL3/MIP-1 $\alpha$ | 0.0171     | NS       | 0.0047  | 0.0022  | 0.0018    | 0.0004   |
| CCL4/MIP-1 $\beta$  | 0.0042     | NS       | <0.0001 | 0.0015  | <0.0001   | 0.0011   |
| CCL5/RANTES         | NS         | NS       | NS      | NS      | 0.0416    | NS       |
| CCL11/EOTAXIN       | NS         | NS       | NS      | NS      | NS        | NS       |
| IFN- $\gamma$       | NS         | NS       | 0.0313  | 0.0459  | 0.0330    | 0.0446   |
| IL-1ra*             | NS         | NS       | NS      | NS      | NS        | NS       |
| IL-2                | NS         | NS       | NS      | NS      | NS        | NS       |
| IL-5                | NS         | NS       | NS      | NS      | NS        | NS       |
| IL-8                | NS         | NS       | NS      | NS      | NS        | NS       |
| IL-9                | NS         | NS       | NS      | NS      | NS        | NS       |
| IL-10               | NS         | 0.0112   | NS      | 0.0060  | NS        | 0.0060   |
| IL-12               | NS         | NS       | NS      | NS      | NS        | NS       |
| IL-13               | NS         | NS       | NS      | NS      | NS        | NS       |
| IL-15*              | NS         | NS       | NS      | NS      | NS        | NS       |
| IL-17               | NS         | NS       | NS      | NS      | NS        | NS       |
| G-CSF               | 0.0110     | NS       | 0.0218  | NS      | 0.0069    | 0.0107   |
| FGF                 | NS         | NS       | 0.0128  | NS      | 0.0329    | NS       |
| PDGF                | NS         | NS       | NS      | NS      | NS        | NS       |
| GM-CSF*             | NS         | NS       | NS      | NS      | NS        | NS       |
| VEGF                | NS         | NS       | 0.0369  | NS      | 0.0369    | 0.0360   |

\*, cytokines that were significantly suppressed by spike protein components (see relevant panels in Figures S2 and S3). NS, not significant (multiple t-test).
